# Supplementary material for: Nitrate nitrogen enhances the efficiency of photoprotection in Leymus chinensis under drought stress
Source: Front Plant Sci. 2024 Feb 14;15:1348925. doi: 10.3389/fpls.2024.1348925 (PMC10899514; doi:10.3389/fpls.2024.1348925)
Supplement: Supplementary file 1 [file DataSheet_1.docx]

**
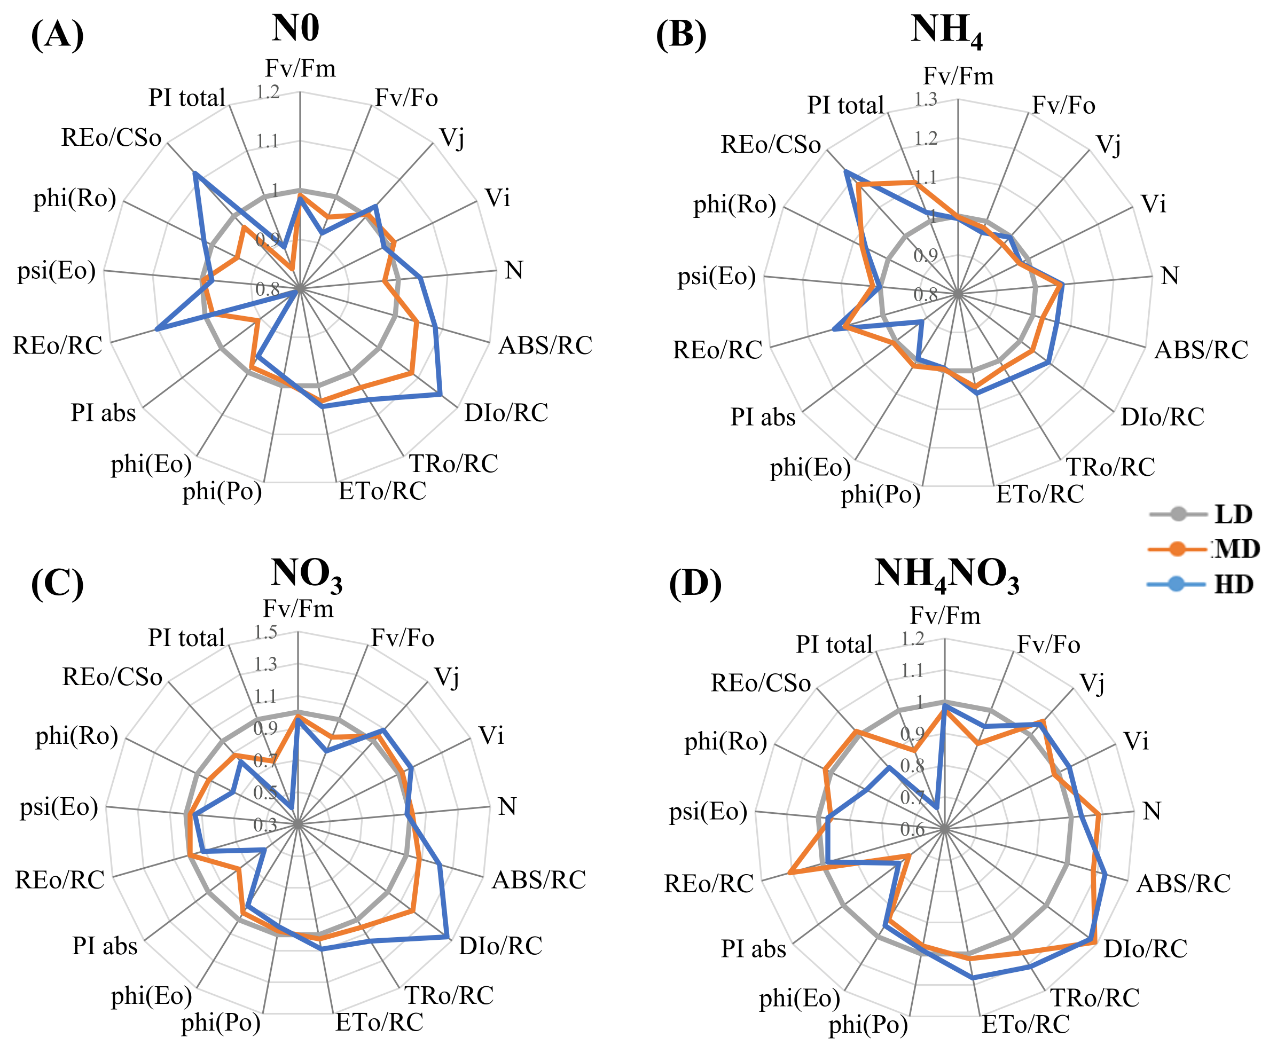
FIGURE S1 |**Radar plot of response of chlorophyll A fluorescence parameters to drought stress under different nitrogen forms of *L. chinensis* leaves. N0 treatment (A), NH4 treatment(B), NO3 treatment (C), NH4NO3 treatment (D). Drought stress treatments (LD, MD, HD). The definitions of the abbreviations show in the table of main abbreviations.


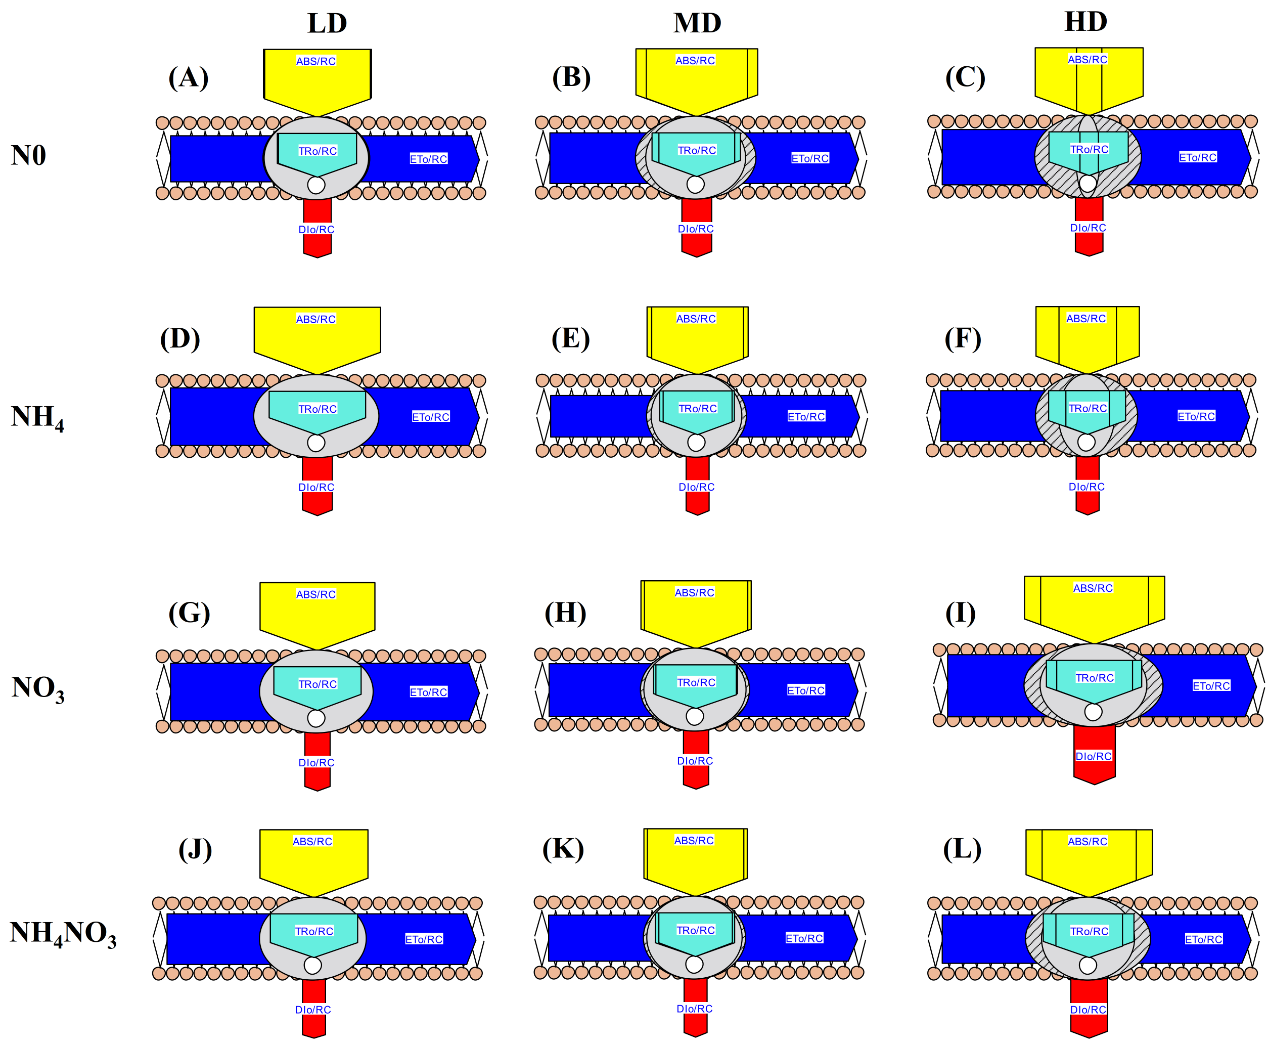


**FIGURE S2 |** The pipeline models for specific fluxes (membrane model) of *L. chinensis* under different nitrogen forms and drought stress. (A)- (L)：The leaf membrane model under drought stress (LD, MD and HD) treatments and different nitrogen forms (N0, NH4, NO3 and NH4NO3) treatments. Each arrow thickness represents electron transport flux per RC (ETo/RC) (blue pentagon), absorption flux per RC (ABS/RC) (yellow pentagon), dissipated energy flux per RC (DIo/RC) (red pentagon) and trapped energy flux per RC (TRo/RC) (light green triangle). In membrane models, the gray circles and shadow circles represent the active and inactive RCs, respectively.
